# Supplementary material for: Healthcare-Associated Laboratory-Confirmed Bloodstream Infections—Species Diversity and Resistance Mechanisms, a Four-Year Retrospective Laboratory-Based Study in the South of Poland
Source: Int J Environ Res Public Health. 2021 Mar 9;18(5):2785. doi: 10.3390/ijerph18052785 (PMC7967254; doi:10.3390/ijerph18052785)
Supplement: Supplementary file 1 [file ijerph-18-02785-s001.xlsx]

## Sheet: Arkusz1
Microorganisms	Genus	Species
			2016	%	2017	%	2018	%	2019	%	total	%	ICUs	%	surgery	%
Gram positive	Aerococcus	Aerococcus viridans	3	0.359281		0		0	1	0.0801925	4	0.0948317		0		0
		Aerococcus urinae		0	1	0.0849618		0		0	1	0.0237079		0		0
	Actinomyces	Actinomyces europaeus		0		0		0	1	0.0801925	1	0.0237079		0		0
		Actinomyces neuii		0		0	1	0.104275		0	1	0.0237079		0		0
		Actinomyces odontolyticus	1	0.11976		0		0		0	1	0.0237079	1	0.358423		0
		Actinomyces oris		0	2	0.169924		0	1	0.0801925	3	0.0711238		0	1	0.26178
		Actinomyces radicidentis		0		0		0	1	0.0801925	1	0.0237079		0		0
	Anaeroccocus	Anaerococcus lactolyticus	1	0.11976		0		0		0	1	0.0237079		0		0
		Anaerococcus vaginalis		0		0		0	1	0.0801925	1	0.0237079		0		0
		Anaerococcus hydrogenalis		0	1	0.0849618		0		0	1	0.0237079		0		0
		Anaerococcus prevotii		0		0	1	0.104275		0	1	0.0237079		0		0
	Arthrobacter	Arthrobacter cumminsii		0	1	0.0849618	3	0.312826		0	4	0.0948317		0	1	0.26178
	Atopobium	Atopobium rimae		0		0	1	0.104275		0	1	0.0237079		0		0
	Bacillus	Bacillus altitudinis		0		0	1	0.104275		0	1	0.0237079		0	1	0.26178
		Bacillus amyloliquefaciens		0		0		0	1	0.0801925	1	0.0237079		0		0
		Bacillus badius		0		0		0	1	0.0801925	1	0.0237079		0		0
		Bacillus cereus	1	0.11976	2	0.169924	4	0.417101	2	0.160385	9	0.213371		0		0
		Bacillus circulans		0	1	0.0849618		0	2	0.160385	3	0.0711238		0		0
		Bacillus licheniformis		0		0	1	0.104275	1	0.0801925	2	0.0474158		0		0
		Bacillus pumilus		0		0	1	0.104275	2	0.160385	3	0.0711238		0	1	0.26178
		Bacillus simplex		0		0		0	1	0.0801925	1	0.0237079		0		0
		Bacillus subtilis	1	0.11976	1	0.0849618		0		0	2	0.0474158		0		0
		Bacillus thuringiensis	1	0.11976		0	1	0.104275		0	2	0.0474158		0		0
		Bacillus spp.	2	0.239521	3	0.254885	1	0.104275		0	6	0.142248		0	2	0.52356
	Bifidobacterium	Bifidobacterium bifidum		0		0		0	1	0.0801925	1	0.0237079		0		0
		Bifidobacterium breve	1	0.11976	1	0.0849618		0		0	2	0.0474158		0		0
		Bifidobacterium longum		0		0		0	1	0.0801925	1	0.0237079		0		0
	Brevibacterium	Brevibacterium casei		0	1	0.0849618		0	3	0.240577	4	0.0948317		0	1	0.26178
		Brevibacterium paucivorans	1	0.11976		0		0		0	1	0.0237079		0		0
		Brevibacterium ravenspurgenes	1	0.11976		0		0	1	0.0801925	2	0.0474158		0	1	0.26178
	Clostridium	Clostriduim aldenense		0		0		0	1	0.0801925	1	0.0237079		0		0
		Clostridium butyricum		0		0		0	1	0.0801925	1	0.0237079	1	0.358423		0
		Clostridium paraputrificum		0		0		0	1	0.0801925	1	0.0237079	1	0.358423		0
		Clostridium perfringens	1	0.11976	2	0.169924	7	0.729927	2	0.160385	12	0.284495	1	0.358423		0
		Clostridium sordellii		0		0	1	0.104275		0	1	0.0237079		0		0
	Carnobacterium	Carnobacterium divergens		0		0		0	1	0.0801925	1	0.0237079		0	1	0.26178
	Corynebacterium	Corynebacterium accolens		0	1	0.0849618		0		0	1	0.0237079		0		0
		Corynebacterium afermentans	10	1.1976	8	0.679694	9	0.938478	6	0.481155	33	0.782361	1	0.358423	6	1.57068
		Corynebacterium amycolatum	4	0.479042	1	0.0849618	1	0.104275	3	0.240577	9	0.213371	1	0.358423		0
		Corynebacterium aurimucosum	1	0.11976		0		0	2	0.160385	3	0.0711238		0		0
		Corynebacterium confusum		0		0	1	0.104275		0	1	0.0237079	1	0.358423		0
		Corynebacterium coyleae		0	1	0.0849618		0		0	1	0.0237079		0		0
		Corynebacterium diphteriae		0	1	0.0849618		0		0	1	0.0237079		0		0
		Corynebacterium durum		0		0		0	1	0.0801925	1	0.0237079		0	1	0.26178
		Corynebacterium freneyi		0		0		0	1	0.0801925	1	0.0237079		0		0
		Corynebacterium glutamicum		0		0		0	1	0.0801925	1	0.0237079		0		0
		Corynebacterium imitans	1	0.11976	1	0.0849618	1	0.104275	3	0.240577	6	0.142248	1	0.358423	1	0.26178
		Corynebacterium jeikeium	1	0.11976	2	0.169924		0	1	0.0801925	4	0.0948317		0		0
		Corynebacterium lipophiloflavum		0		0		0	2	0.160385	2	0.0474158		0		0
		Corynebacterium multifaciens	1	0.11976		0	3	0.312826	1	0.0801925	5	0.11854		0		0
		Corynebacterium simulans		0		0		0	2	0.160385	2	0.0474158	1	0.358423		0
		Corynebacterium striatum	1	0.11976	7	0.594732	2	0.208551	1	0.0801925	11	0.260787	4	1.43369	3	0.78534
		Corynebacterium tuberculostearicum		0	2	0.169924	4	0.417101	3	0.240577	9	0.213371	1	0.358423		0
		Corynebacterium urealyticum		0	1	0.0849618	4	0.417101		0	5	0.11854		0		0
		Corynebacterium variabile	1	0.11976		0		0		0	1	0.0237079		0		0
		Corynebacterium xerosis		0		0		0	1	0.0801925	1	0.0237079		0		0
	Cutibacterium	Cutibacterium acnes		0		0		0	3	0.240577	3	0.0711238		0	1	0.26178
		Cutibacterium avidum		0		0		0	1	0.0801925	1	0.0237079		0		0
	Dermabacter	Dermabacter hominis		0		0	2	0.208551	4	0.32077	6	0.142248	1	0.358423		0
	Dietzia	Dietzia cinnamea		0		0	1	0.104275		0	1	0.0237079		0		0
	Enterococcus	Enterococcus faecalis	21	2.51497	45	3.82328	43	4.48384	46	3.68885	155	3.67473	14	5.01792	15	3.9267
		Enterococcus faecium	7	0.838323	12	1.01954	12	1.2513	10	0.801925	41	0.972025	7	2.50896	6	1.57068
		Enterococcus gilvus		0	1	0.0849618		0		0	1	0.0237079		0		0
	Erysipelotrhrix	Erysipelothrix rhusiopathiae	1	0.11976		0		0		0	1	0.0237079		0		0
	Eubacterium	Eubacterium tenue		0	1	0.0849618		0		0	1	0.0237079		0		0
	Facklamia	Facklamia hominis		0		0		0	1	0.0801925	1	0.0237079		0		0
	Finegoldia	Finegoldia magna		0	1	0.0849618	1	0.104275	2	0.160385	4	0.0948317		0	1	0.26178
	Gemella	Gemella haemolysans	2	0.239521		0		0	2	0.160385	4	0.0948317	1	0.358423	1	0.26178
		Gemella morbillorum		0	1	0.0849618		0		0	1	0.0237079		0		0
	Globicatella	Globicatella sanguinis		0		0		0	1	0.0801925	1	0.0237079		0		0
	Granulicatella	Granulicatella adiacens		0		0	3	0.312826		0	3	0.0711238		0		0
	Kocuria	Kocuria kristinae		0	3	0.254885	1	0.104275	1	0.0801925	5	0.11854		0		0
		Kocuria rhizophila		0		0		0	3	0.240577	3	0.0711238		0	1	0.26178
		Kocuria spp.		0	1	0.0849618		0	2	0.160385	3	0.0711238		0	1	0.26178
	Lactobacillus	Lactobacillus acidophilus		0		0		0	1	0.0801925	1	0.0237079		0		0
		Lactobacillus antri		0		0	1	0.104275		0	1	0.0237079		0		0
		Lactobacillus curvatus	1	0.11976		0		0		0	1	0.0237079		0		0
		Lactobacillus delbrueckii	1	0.11976		0	1	0.104275		0	2	0.0474158		0	1	0.26178
		Lactobacillus fermentum		0		0		0	1	0.0801925	1	0.0237079		0		0
		Lactobacillus gasseri		0	2	0.169924		0	2	0.160385	4	0.0948317		0	1	0.26178
		Lactobacillus murinus		0		0		0	1	0.0801925	1	0.0237079		0		0
		Lactobacillus paracasei		0	2	0.169924		0		0	2	0.0474158		0		0
		Lactobacillus rhamnosus		0		0		0	1	0.0801925	1	0.0237079		0		0
		Lactobacillus spp.		0		0		0	2	0.160385	2	0.0474158	1	0.358423		0
	Lactococcus	Lactococcus lactis	1	0.11976		0		0	1	0.0801925	2	0.0474158		0		0
	Leuconostoc	Leuconostoc lactis	1	0.11976		0	1	0.104275		0	2	0.0474158		0	1	0.26178
		Leuconostoc mesenteroides	1	0.11976		0		0		0	1	0.0237079		0		0
	Listeria	Listeria monocytogenes	3	0.359281	3	0.254885		0	2	0.160385	8	0.189663		0		0
	Macrococcus	Macrococcus caseolyticus		0		0		0	1	0.0801925	1	0.0237079		0	1	0.26178
	Microbacterium	Microbacterium aurum		0		0		0	1	0.0801925	1	0.0237079		0		0
		Microbacterium lacticum		0		0		0	1	0.0801925	1	0.0237079		0		0
	Micrococcus	Micrococcus luteus	7	0.838323	17	1.44435	16	1.6684	33	2.64635	73	1.73068	4	1.43369	7	1.83246
		Micrococcus spp.	11	1.31737	9	0.764656	1	0.104275	2	0.160385	23	0.545282		0	1	0.26178
	Nosocomiicoccus	Nosocomiicoccus massiliensis		0		0		0	1	0.0801925	1	0.0237079		0		0
	Paenarthrobacter	Paenarthrobacter ilicis		0		0		0	1	0.0801925	1	0.0237079		0		0
	Paenibacillus	Paenibacillus timonensis		0		0		0	1	0.0801925	1	0.0237079		0		0
		Paenibacillus xylanilyticus		0		0	1	0.104275		0	1	0.0237079		0		0
		Paenibacillus spp.		0		0		0	1	0.0801925	1	0.0237079		0		0
	Peptoniphilus	Peptoniphilus harei	2	0.239521	1	0.0849618		0		0	3	0.0711238	1	0.358423	1	0.26178
	Propionibacterium	Propionibacterium acnes	12	1.43713	12	1.01954	8	0.834202	5	0.400962	37	0.877193	10	3.58423	3	0.78534
		Propionibacterium granulosum		0		0		0	1	0.0801925	1	0.0237079		0		0
		Probionimicrobium lymphophilum		0		0		0	1	0.0801925	1	0.0237079		0		0
	Pseudoglumicibacter	Pseudoglutamicibacter cumminsii		0		0		0	1	0.0801925	1	0.0237079		0		0
	Psychrobacillus	Psychrobacillus psychrotolerans		0	1	0.0849618		0		0	1	0.0237079	1	0.358423		0
	Rothia	Rothia dentocariosa	1	0.11976		0	1	0.104275	1	0.0801925	3	0.0711238		0		0
		Rothia endophytica		0		0		0	1	0.0801925	1	0.0237079		0		0
		Rothia mucilaginosa	1	0.11976	2	0.169924	2	0.208551	4	0.32077	9	0.213371		0	1	0.26178
	Ruminococcus	Ruminococcus gnavus		0		0		0	1	0.0801925	1	0.0237079		0		0
	Solobacterium	Solobacterium moorei		0		0	1	0.104275		0	1	0.0237079	1	0.358423		0
	Staphylococcus	Staphylococcus arlettae	2	0.239521		0		0		0	2	0.0474158		0		0
		Staphylococcus aureus	67	8.02395	71	6.03229	67	6.98644	69	5.53328	274	6.49597	9	3.22581	21	5.49738
		Staphylococcus capitis	9	1.07784	28	2.37893	22	2.29406	16	1.28308	75	1.77809	9	3.22581		0
		Staphylococcus caprae	1	0.11976	2	0.169924	1	0.104275		0	4	0.0948317		0		0
		Staphylococcus cohnii	1	0.11976		0	1	0.104275	3	0.240577	5	0.11854		0	1	0.26178
		Staphylococcus epidermidis	186	22.2754	242	20.5607	168	17.5182	221	17.7225	817	19.3694	52	18.638	75	19.6335
		Staphylococcus eqorum		0		0	1	0.104275		0	1	0.0237079		0		0
		Staphylococcus haemolyticus	37	4.43114	60	5.09771	62	6.46507	81	6.49559	240	5.6899	17	6.09319	30	7.8534
		Staphylococcus hominis	126	15.0898	148	12.5743	156	16.2669	185	14.8356	615	14.5804	15	5.37634	52	13.6126
		Staphylococcus pasteuri	1	0.11976		0		0		0	1	0.0237079		0		0
		Staphylococcus lugdunensis		0	3	0.254885		0	2	0.160385	5	0.11854	1	0.358423		0
		Staphylococcus pettenkoferi	3	0.359281	11	0.934579	7	0.729927	8	0.64154	29	0.68753	1	0.358423	2	0.52356
		Staphylococcus saccharolyticus	1	0.11976		0	1	0.104275	6	0.481155	8	0.189663	1	0.358423		0
		Staphylococcus saprophyticus	1	0.11976		0	1	0.104275	1	0.0801925	3	0.0711238		0	1	0.26178
		Staphylococcus sciuri		0		0		0	1	0.0801925	1	0.0237079		0	1	0.26178
		Staphylococcus simulans	2	0.239521		0	2	0.208551	5	0.400962	9	0.213371		0	1	0.26178
		Staphylococcus lutrae		0	1	0.0849618	1	0.104275		0	2	0.0474158	1	0.358423		0
		Staphylococcus warneri	7	0.838323	8	0.679694	4	0.417101	9	0.721732	28	0.663822		0	3	0.78534
		Staphylococcus xylosus		0	2	0.169924		0		0	2	0.0474158		0		0
	Streptococcus	Streptococcus agalactiae	5	0.598802	7	0.594732	4	0.417101	7	0.561347	23	0.545282		0	2	0.52356
		Streptococcus anginosus	1	0.11976	4	0.339847	4	0.417101	3	0.240577	12	0.284495	1	0.358423		0
		Streptococcus beta-hem. gr.C		0	4	0.339847	1	0.104275	2	0.160385	7	0.165955	1	0.358423		0
		Streptococcus beta-hem. gr.G	3	0.359281	1	0.0849618		0		0	4	0.0948317		0	1	0.26178
		Streptococcus constellatus	1	0.11976	1	0.0849618		0	2	0.160385	4	0.0948317		0		0
		Streptococcus cristatus		0	1	0.0849618	2	0.208551	3	0.240577	6	0.142248	1	0.358423	1	0.26178
		Streptococcus equinus		0		0	1	0.104275		0	1	0.0237079		0	1	0.26178
		Streptococcus gallolyticus	2	0.239521	7	0.594732	3	0.312826	2	0.160385	14	0.331911		0		0
		Strptococcus gordonii		0	5	0.424809	1	0.104275	1	0.0801925	7	0.165955		0	1	0.26178
		Streptococcus infantis		0		0		0	1	0.0801925	1	0.0237079		0		0
		Streptococcus intermedius	1	0.11976		0		0		0	1	0.0237079		0		0
		Streptococcus lutetiensis		0		0	1	0.104275		0	1	0.0237079	1	0.358423		0
		Streptococcus mitis	4	0.479042	15	1.27443	6	0.625652	4	0.32077	29	0.68753	3	1.07527	3	0.78534
		Streptococcus oralis	10	1.1976	10	0.849618	6	0.625652	13	1.0425	39	0.924609	1	0.358423	3	0.78534
		Streptococcus parasanguinis	4	0.479042	6	0.509771	9	0.938478	7	0.561347	26	0.616406	1	0.358423	1	0.26178
		Streptococcus peroris		0	1	0.0849618		0		0	1	0.0237079		0		0
		Streptococcus pneumoniae	4	0.479042	9	0.764656	9	0.938478	14	1.12269	36	0.853485	1	0.358423		0
		Streptococcus pyogenes	2	0.239521	4	0.339847	3	0.312826	5	0.400962	14	0.331911	2	0.716846	1	0.26178
		Streptococcus salivarius	8	0.958084	5	0.424809	5	0.521376	2	0.160385	20	0.474158	2	0.716846	1	0.26178
		Streptococcus sanguinis	2	0.239521	1	0.0849618	2	0.208551	1	0.0801925	6	0.142248		0		0
		Streptococcus vestibularis	1	0.11976		0	2	0.208551	6	0.481155	9	0.213371	1	0.358423		0
	Trueperella	Trueperella atypica		0		0		0	1	0.0801925	1	0.0237079		0		0
	Zimmermannella	Zimmermannella facecalis		0		0	1	0.104275		0	1	0.0237079		0		0
Total Gram positive			599	71.7365	812	68.989	698	72.7842	880	70.5694	2989	70.863	176	63.0824	265	69.3717
Gram negative	Achromobacter	Achromobacter cumminsii		0	1	0.0849618		0		0	1	0.0237079		0		0
	Acinetobacter	Acinetobacter baumannii	5	0.598802	14	1.18946	7	0.729927	17	1.36327	43	1.01944	17	6.09319	6	1.57068
		Acinetobacter guillouiae	1	0.11976	2	0.169924		0		0	3	0.0711238		0	1	0.26178
		Acinetobacter junii	1	0.11976		0		0		0	1	0.0237079		0		0
		Acinetobacter lwoffii	3	0.359281	3	0.254885		0	1	0.0801925	7	0.165955		0		0
		Acinetobacter noscomialis	1	0.11976		0		0		0	1	0.0237079		0		0
		Acinetobacter radioresistens		0		0		0	1	0.0801925	1	0.0237079		0		0
		Acinetobacter ursingii	1	0.11976		0		0	2	0.160385	3	0.0711238		0	1	0.26178
	Aeromonas	Aeromonas hydrophila		0		0		0	1	0.0801925	1	0.0237079		0	1	0.26178
	Aureimonas	Aureimonas altamirensis	1	0.11976		0		0		0	1	0.0237079		0		0
	Bacteroides	Bacteroides caccae		0	1	0.0849618		0		0	1	0.0237079		0		0
		Bacteroides fragilis	2	0.239521	9	0.764656	3	0.312826	11	0.882117	25	0.592698	1	0.358423	2	0.52356
		Bacteroides ovatus		0		0	1	0.104275	1	0.0801925	2	0.0474158		0	1	0.26178
		Bacteroides salyersiae		0		0	1	0.104275		0	1	0.0237079		0		0
		Bacteroides thetaiotaomicron		0		0	2	0.208551		0	2	0.0474158		0		0
		Bacteroides vulgatus		0	1	0.0849618	1	0.104275		0	2	0.0474158		0	1	0.26178
	Capnocytophaga	Capnocytophaga canimorsus		0	1	0.0849618		0		0	1	0.0237079		0		0
	Chryseobacterium	Chryseobacterium spp.	1	0.11976		0		0		0	1	0.0237079		0		0
	Citrobacter	Citrobacter freundii	1	0.11976	4	0.339847		0	3	0.240577	8	0.189663	2	0.716846		0
		Citrobacter koseri		0		0		0	2	0.160385	2	0.0474158		0	1	0.26178
	Cronobacter	Cronobacter sakazakii		0		0	1	0.104275		0	1	0.0237079		0		0
	Dialister	Dialister micraerophilus		0		0		0	1	0.0801925	1	0.0237079		0		0
	Eiknella	Eiknella corrodens		0		0	1	0.104275		0	1	0.0237079		0		0
	Enterobacter	Enterobacter cloacae	6	0.718563	10	0.849618	7	0.729927	11	0.882117	34	0.806069		0	2	0.52356
	Escherichia	Escherichia coli	125	14.9701	184	15.633	124	12.9301	145	11.6279	578	13.7032	25	8.96057	37	9.68586
	Flavobacterium	Flavobacterium flavescens		0	1	0.0849618		0		0	1	0.0237079		0	1	0.26178
	Fusobacterium	Fusobacterium nucleatum		0		0		0	2	0.160385	2	0.0474158		0		0
		Fusobacterium necrophorum	1	0.11976	1	0.0849618	1	0.104275		0	3	0.0711238		0		0
	Haemophilus	Haemophilus influenzae		0		0		0	3	0.240577	3	0.0711238		0		0
	Klebsiella	Klebsiella mobilis	1	0.11976		0		0		0	1	0.0237079		0		0
		Klebsiella oxytoca	4	0.479042	2	0.169924	2	0.208551	7	0.561347	15	0.355619	1	0.358423		0
		Klebsiella pneumoniae	46	5.50898	74	6.28717	53	5.52659	68	5.45309	241	5.71361	29	10.3943	25	6.5445
		Klebsiella variicola		0		0		0	1	0.0801925	1	0.0237079		0		0
	Leptotricha	Leptotricha hofstadii		0		0		0	1	0.0801925	1	0.0237079		0		0
	Moraxella	Moraxella osloensis	1	0.11976		0		0	3	0.240577	4	0.0948317		0		0
	Morganella	Morganella morganii	3	0.359281	1	0.0849618	4	0.417101	5	0.400962	13	0.308203	2	0.716846	1	0.26178
	Neisseria	Neisseria flavescens	2	0.239521		0		0		0	2	0.0474158		0		0
		Neisseria meningitidis	1	0.11976	1	0.0849618	1	0.104275		0	3	0.0711238		0		0
		Neisseria mucosa	1	0.11976		0		0		0	1	0.0237079		0		0
	Ochrobactrum	Ochrobactrum anthropi		0		0	1	0.104275		0	1	0.0237079		0		0
	Pantoea	Pantoea agglomerans		0		0	2	0.208551		0	2	0.0474158		0		0
		Pantoea septica		0	1	0.0849618		0		0	1	0.0237079		0		0
	Prevotella	Prevotella buccae		0		0		0	2	0.160385	2	0.0474158		0		0
	Parabacteroides	Parabacteroides distasonis	1	0.11976		0		0		0	1	0.0237079		0		0
	Porphyromonas	Porphyromonas uenonis		0	1	0.0849618		0		0	1	0.0237079		0	1	0.26178
	Proteus	Proteus mirabilis	9	1.07784	10	0.849618	11	1.14703	23	1.84443	53	1.25652	1	0.358423	5	1.3089
		Proteus vulgaris	1	0.11976		0		0		0	1	0.0237079		0		0
	Providencia	Providencia rettgeri		0		0		0	3	0.240577	3	0.0711238		0	2	0.52356
		Providencia stuartii		0		0		0	3	0.240577	3	0.0711238		0	1	0.26178
	Pseudomonas	Pseudomonas aeruginosa	5	0.598802	10	0.849618	16	1.6684	10	0.801925	41	0.972025	6	2.15054	6	1.57068
		Pseudomonas fulva		0	1	0.0849618		0		0	1	0.0237079		0		0
		Pseudomonas monteilii		0	1	0.0849618		0		0	1	0.0237079		0		0
		Pseudomonas oryzihabitans		0	1	0.0849618		0	1	0.0801925	2	0.0474158		0		0
		Pseudomonas stutzeri		0		0		0	1	0.0801925	1	0.0237079		0	1	0.26178
	Psychrobacter	Psychrobacter phenylpyrovicus		0		0		0	1	0.0801925	1	0.0237079		0		0
		Psychrobacter sanguinis		0		0		0	1	0.0801925	1	0.0237079		0		0
	Roseomonas	Roseomonas mucosa		0		0		0	1	0.0801925	1	0.0237079		0		0
	Salmonella	Salmonella Enteritidis	1	0.11976	5	0.424809		0		0	6	0.142248		0	1	0.26178
		Salmonella Virchow	1	0.11976		0		0		0	1	0.0237079		0		0
		Salmonella spp.		0	1	0.0849618	6	0.625652	5	0.400962	12	0.284495	1	0.358423	1	0.26178
	Serratia	Serratia marcescens		0	3	0.254885	2	0.208551	2	0.160385	7	0.165955	2	0.716846		0
		Serratia liquefaciens		0		0	1	0.104275		0	1	0.0237079		0		0
	Sphingobium	Sphingobium sp.		0	1	0.0849618		0		0	1	0.0237079		0		0
	Stenotrophomonas	Stenotrophomonas maltophilia	1	0.11976	3	0.254885	2	0.208551	3	0.240577	9	0.213371	1	0.358423	3	0.78534
	Streptomyces	Streptomyces badius		0		0	1	0.104275		0	1	0.0237079		0		0
	Veilonella	Veillonella parvula	1	0.11976	1	0.0849618		0	1	0.0801925	3	0.0711238		0	1	0.26178
	Yersinia	Yersinia enterocolitica		0	1	0.0849618		0		0	1	0.0237079		0		0
Total Gram negative			228	27.3054	350	29.7366	251	26.1731	343	27.506	1172	27.7857	88	31.5412	102	26.7016
				0		0		0		0	0	0		0		0
Total bacteria			827	99.0419	1162	98.7256	949	98.9572	1223	98.0754	4161	98.6486	264	94.6237	367	96.0733
				0		0		0		0	0	0		0		0
				0		0		0		0	0	0		0		0
Fungi	Candida	Candida albicans	3	0.359281	7	0.594732	6	0.625652	8	0.64154	24	0.56899	6	2.15054	4	1.04712
		Candida dubliniensis	1	0.11976	1	0.0849618		0	1	0.0801925	3	0.0711238	1	0.358423		0
		Candida glabrata	3	0.359281	6	0.509771	2	0.208551	4	0.32077	15	0.355619	6	2.15054	4	1.04712
		Candida lusitaniae		0	1	0.0849618	1	0.104275	2	0.160385	4	0.0948317		0	1	0.26178
		Candida parapsilopsis		0		0		0	7	0.561347	7	0.165955		0	5	1.3089
		Candida tropicalis		0		0	1	0.104275		0	1	0.0237079		0		0
	Cryptococcus	Cryptococcus neoformans		0		0		0	1	0.0801925	1	0.0237079	1	0.358423		0
	Saccharomyces	Saccharomyces cerevisiae	1	0.11976		0		0		0	1	0.0237079	1	0.358423		0
	Molds			0		0		0	1	0.0801925	1	0.0237079		0	1	0.26178
			8	0.958084	15	1.27443	10	1.04275	24	1.92462	57	1.35135	15	5.37634	15	3.9267
				0		0		0		0	0	0		0		0
LC BSI			835	100	1177	100	959	100	1247	100	4218	100	279	100	382	100
negative bloodstream culture			1152		1388		932		1209		4681		84		175
all patients			1987		2565		1891		2456		8899		363		557
